# Supplementary material for: Sutureless and Rapid Deployment vs. Transcatheter Valves for Aortic Stenosis in Low-Risk Patients: Mid-Term Results
Source: MDPI journal article supplement (doi:10.3390/jcm12124045), 2023-06-14

Supplementary Figure 1 – Landmark analysis for overall survival in the matched group

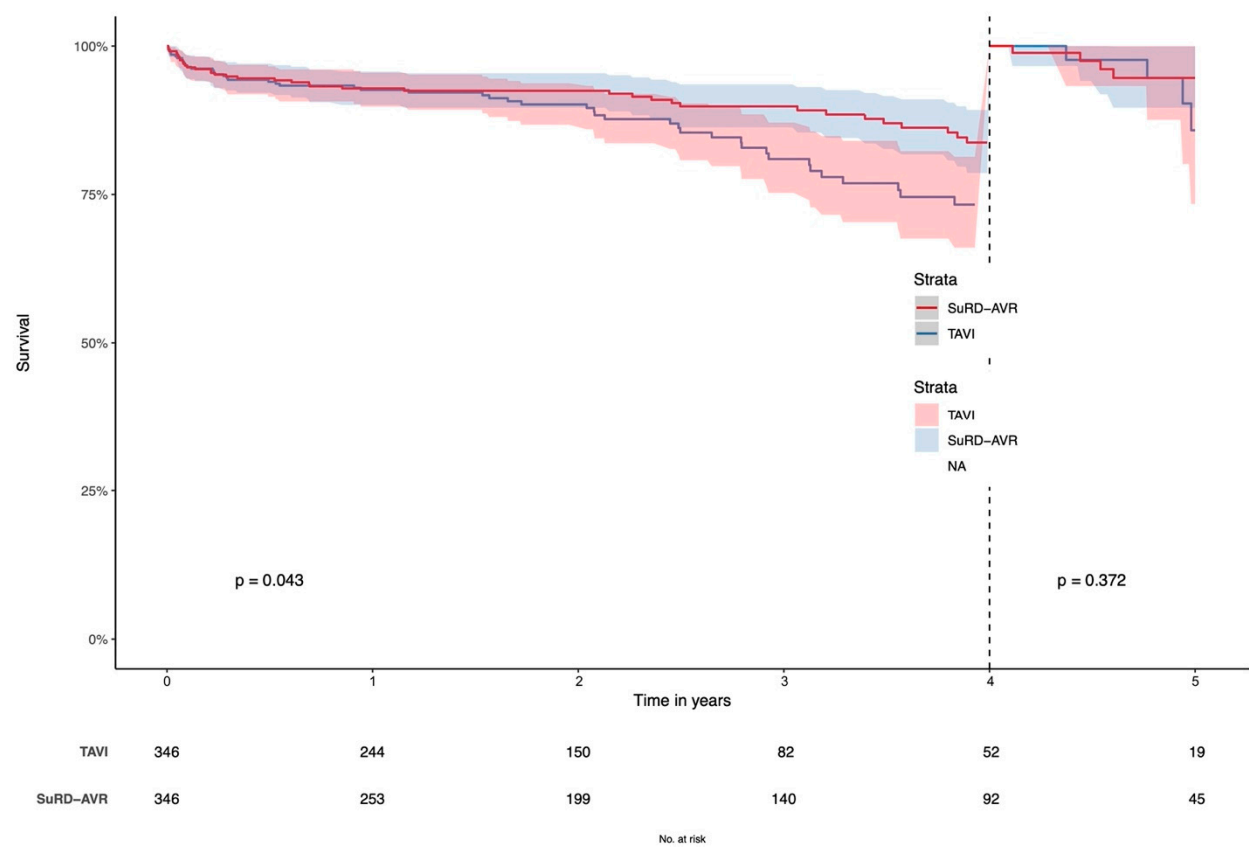

Supplementary Figure 2 - Landmark analysis for overall survival in the non-matched group

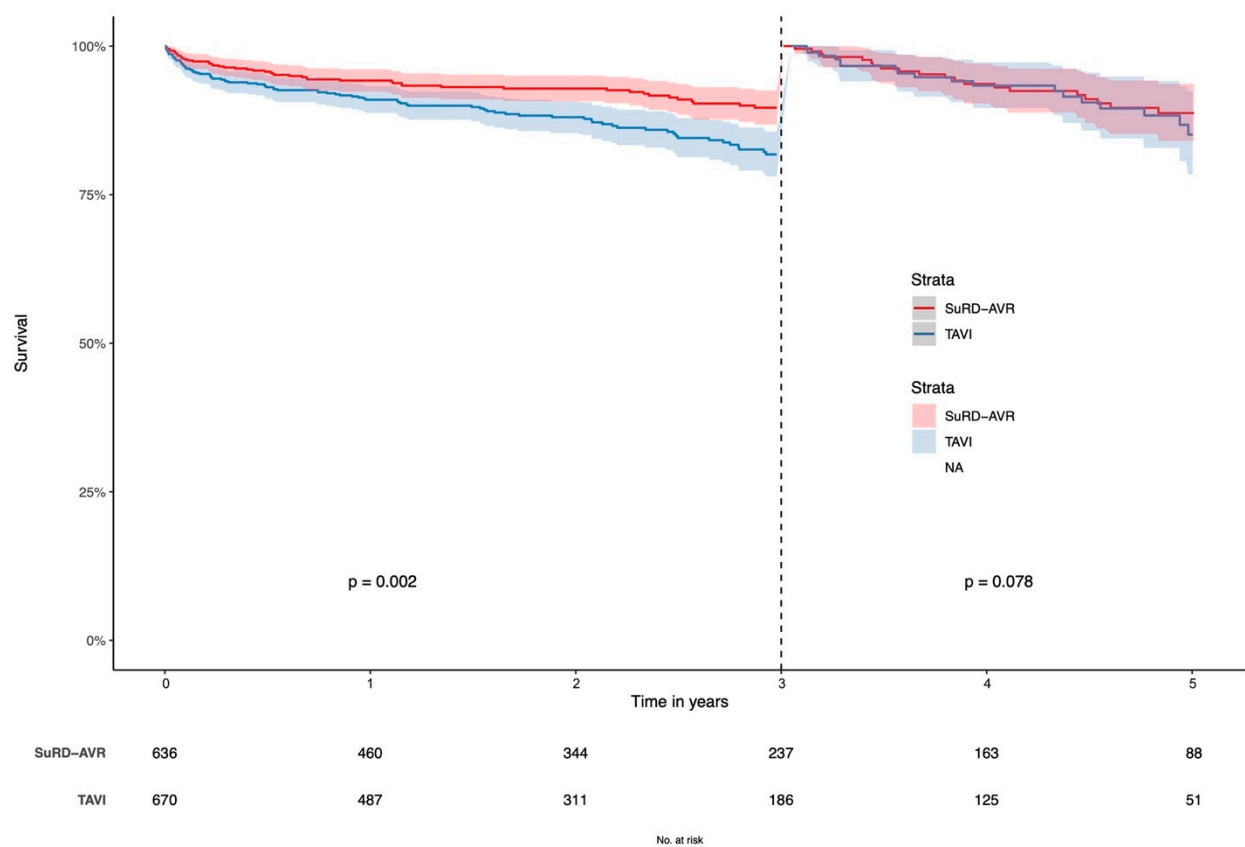

Supplementary Figure 3 - Landmark analysis for survival freedom from MACCE in the matched group

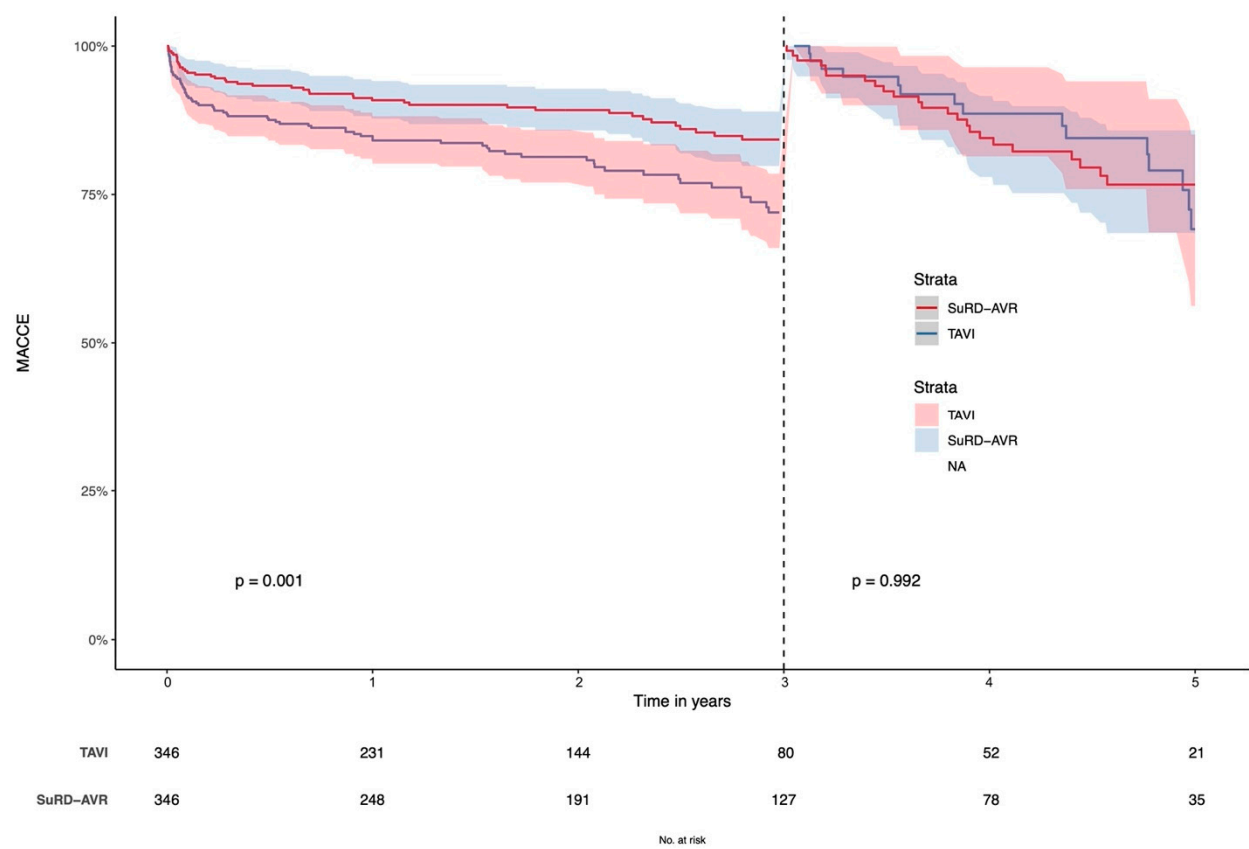

Supplementary Figure 4 - Landmark analysis for survival freedom from MACCE in the non-matched group

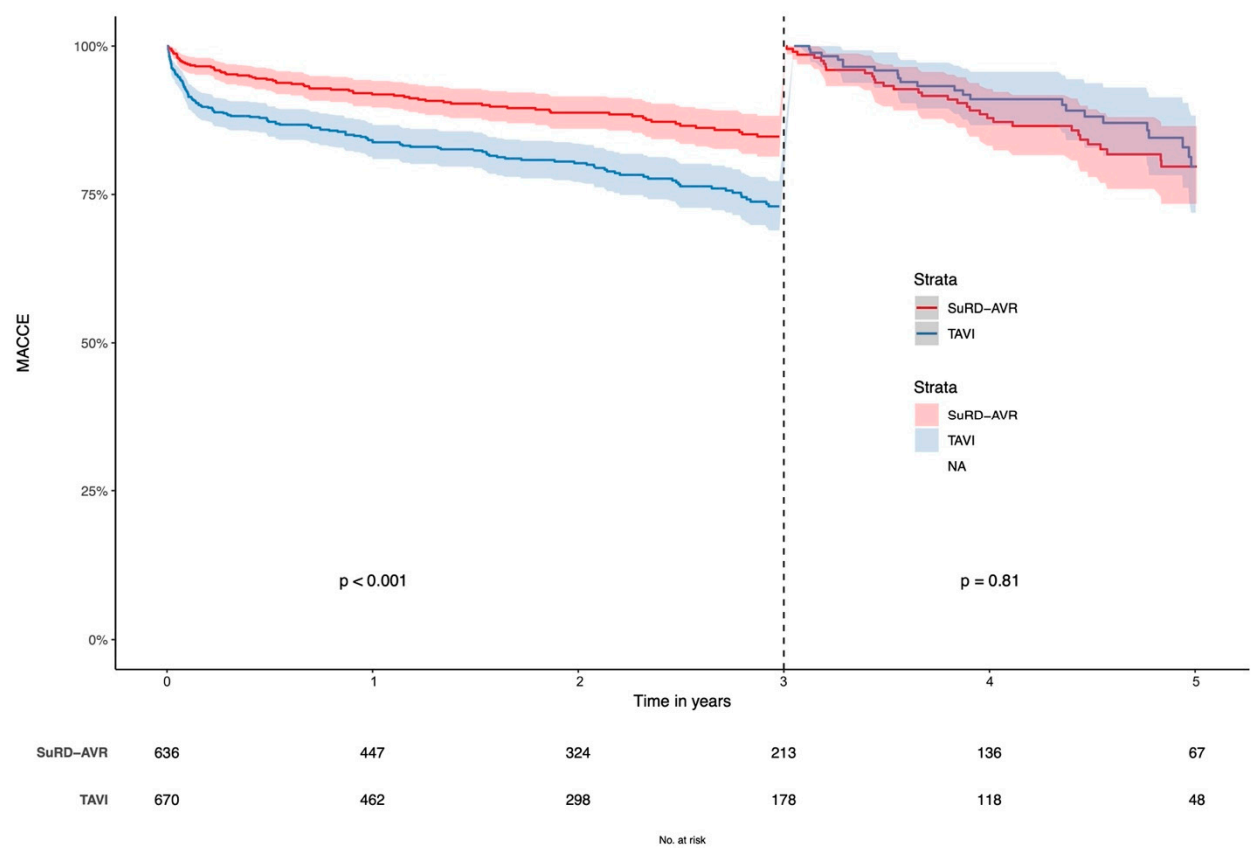

Supplement: s1 [file s1]
